# Supplementary material for: Antimicrobial Susceptibility Profiles of Bacteria Commonly Isolated from Farmed Salmonids in Atlantic Canada (2000–2021)
Source: MDPI journal article supplement (doi:10.3390/vetsci9040159), 2022-03-25
Supplement: s1 [file s1]

# Antimicrobial Susceptibility Profiles of Bacteria Commonly Isolated from Farmed Salmonids in Atlantic Canada (2000–2021)

Rasaq Abiola Ojasanya <sup>1,\*</sup>, Ian A. Gardner <sup>1</sup>, David B. Groman <sup>2</sup>, Sonja Saksida <sup>1</sup>, Matthew E. Saab <sup>2</sup> and Krishna Kumar Thakur <sup>1</sup>

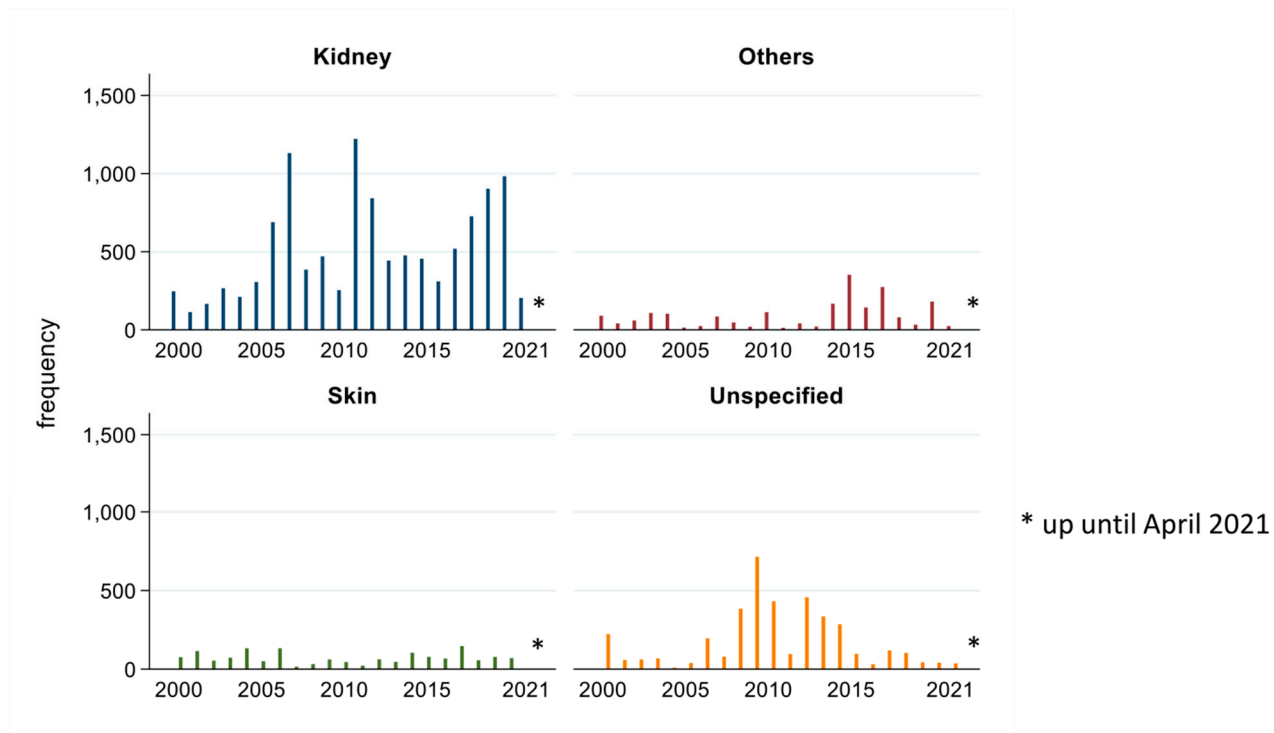

**Figure S1.** Annual frequency of salmonid samples submitted for bacteriology to AVC ADSBL from 2000 to 2021 by anatomic site of sample collection.

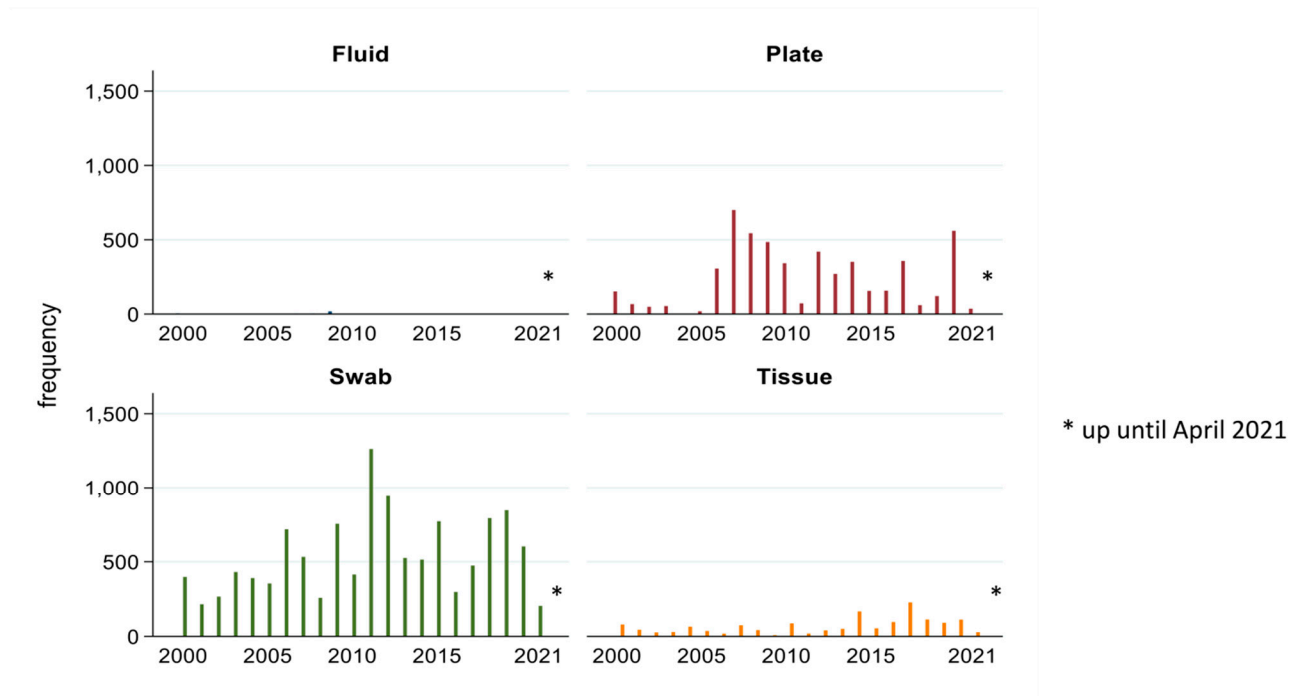

**Figure S2.** Annual frequency of salmonid specimens submitted for bacteriology to AVC ADSBL from 2000 to 2021.

**Table S1.** Frequency of samples originating from different anatomic sites submitted to the AVC ADSBL (2000-2021).

| Species         | Kidney (n = 11,320) | Skin (n = 1517) | Unspecified (n = 3905) | Others (n = 2034) |
|-----------------|---------------------|-----------------|------------------------|-------------------|
| n (%)           |                     |                 |                        |                   |
| Atlantic salmon | 9994 (88.29)        | 1392 (91.76)    | 3700 (94.75)           | 1782 (87.61)      |
| Rainbow trout   | 1326 (11.71)        | 125 (8.24)      | 205 (5.25)             | 252 (12.39)       |

**Table S2.** Bacterial isolates detected from different anatomic sites of salmonids samples submitted to the AVC ADSBL (2000-2021).

| Bacterial Isolates             | Kidney<br>(n = 11,320) | Skin<br>(n = 1517) | Unspecified<br>(n = 3905) | Others<br>(n = 2034) |
|--------------------------------|------------------------|--------------------|---------------------------|----------------------|
|                                | %                      |                    |                           |                      |
| Mixed microbiota               | 9.5                    | 23.7               | 17.4                      | 17.4                 |
| Gram-negative bacilli          | 5.4                    | 7.0                | 16.8                      | 16.8                 |
| <i>Vibrio</i> spp.             | 5.6                    | 15.2               | 8.9                       | 7.0                  |
| <i>Pseudomonas</i> spp.        | 2.4                    | 2.8                | 3.2                       | 4.9                  |
| <i>Aeromonas</i> spp.          | 2.2                    | 2.9                | 2.4                       | 3.2                  |
| <i>Flavobacterium</i> spp.     | 0.3                    | 1.9                | 0.6                       | 4.7                  |
| Gram-positive bacilli          | 1.9                    | 0.7                | 2.4                       | 2.4                  |
| <i>Yersinia</i> spp.           | 1.4                    | 0                  | 1.1                       | 1.1                  |
| <i>Vibrio anguillarum</i>      | 0.1                    | 0                  | 1.2                       | 1.2                  |
| <i>Mycobacterium</i> spp.      | 0.3                    | 0.1                | 1.2                       | 0.1                  |
| <i>Aeromonas sobria</i>        | 0.3                    | 0.1                | 0.6                       | 0.6                  |
| <i>Edwardsiella piscicida</i>  | 1.4                    | 0                  | 0                         | 0                    |
| Gram-positive bacteria         | 0.1                    | 0                  | 0.5                       | 0.5                  |
| <i>Arthrobacter</i> spp.       | 0.4                    | 0                  | 0.3                       | 0.3                  |
| <i>Enterobacter</i> spp.       | 0                      | 0.5                | 0.2                       | 0.2                  |
| <i>Serratia</i> spp.           | 0.1                    | 0                  | 0.4                       | 0.4                  |
| <i>Aliivibrio salmonicida</i>  | 0.5                    | 0                  | 0.2                       | 0.2                  |
| <i>Micrococcus</i> spp.        | 0                      | 0                  | 0.3                       | 0.3                  |
| <i>Shewanella putrefaciens</i> | 0                      | 0.5                | 0                         | 0                    |
| <i>Moraxella</i> spp.          | 0                      | 0.1                | 0.2                       | 0.2                  |
| <i>Vibrio alginolyticus</i>    | 0                      | 0                  | 0.2                       | 0.2                  |
| <i>Bacillus</i> spp.           | 0                      | 0                  | 0.3                       | 0.3                  |
| <i>Staphylococcus</i> spp.     | 0.1                    | 0                  | 0.1                       | 0.1                  |
| <i>Rhodococcus</i> spp.        | 0.1                    | 0                  | 0.1                       | 0.1                  |
| <i>Lactobacillus</i> spp.      | 0.1                    | 0                  | 0.1                       | 0.1                  |
| <i>Hafnia alvei</i>            | 0.2                    | 0                  | 0                         | 0                    |
| <i>Plesiomonas</i> spp.        | 0.2                    | 0                  | 0                         | 0                    |

|                                      |     |     |     |     |
|--------------------------------------|-----|-----|-----|-----|
| <i>Staphylococcus epidermis</i>      | 0   | 0   | 0.1 | 0.1 |
| <i>Streptococcus spp.</i>            | 0   | 0   | 0.1 | 0.1 |
| <i>Yersinia ruckeri</i> type 2       | 0.2 | 0   | 0   | 0   |
| <i>Aliivibrio fischerii</i>          | 0   | 0.1 | 0   | 0   |
| <i>Carnobacterium maltaromaticum</i> | 0.1 | 0   | 0   | 0   |
| <i>Enterococcus spp.</i>             | 0.1 | 0   | 0   | 0   |
| <i>Photobacterium spp.</i>           | 0.1 | 0   | 0   | 0   |
| <i>Proteus mirabilis</i>             | 0.1 | 0   | 0   | 0   |
| <i>Proteus spp.</i>                  | 0.1 | 0   | 0   | 0   |
| <i>Pseudomonas putida</i>            | 0.1 | 0   | 0   | 0   |
| <i>Yersinia ruckeri</i>              | 0.1 | 0   | 0   | 0   |
| <i>Corynebacterium spp.</i>          | 0   | 0.1 | 0   | 0   |

n = number of isolates, Unspecified- sample sites without clear identification. Others-include sample sites from the abdominal cavity, blood, bladder, brain, ova, eye, fin, gill, head, heart, intestine, jaw, liver, mouth, muscle, ovarian fluid, peritoneal cavity, spleen, tail, vent, wound, and yolk sac.

**Table S3.** Frequency of bacterial isolates detection in submitted cases to the AVC ADSBL by species of salmonid samples (2000-2021).

| Bacterial Isolates         | Frequency of Cases | Atlantic Salmon | Rainbow Trout |
|----------------------------|--------------------|-----------------|---------------|
|                            | (n)                | n (%)           | n (%)         |
| Mixed microbiota           | 300                | 281 (93.7)      | 19 (6.3)      |
| Gram-negative bacilli      | 284                | 269 (94.7)      | 15 (5.3)      |
| <i>Vibrio</i> spp          | 150                | 145 (96.7)      | 5 (3.3)       |
| Gram-positive bacilli      | 54                 | 47 (87.0)       | 7 (13.0)      |
| <i>Aeromonas</i> spp.      | 35                 | 34 (97.1)       | 1 (2.86)      |
| <i>Mycobacterium</i> spp.  | 19                 | 19 (100.0)      | 0             |
| <i>Flavobacterium</i> spp. | 14                 | 11 (78.57)      | 3 (21.4)      |
| <i>Yersinia</i> spp.       | 12                 | 12 (100.0)      | 0             |
| <i>Nocardia</i> spp.       | 13                 | 13 (100.0)      | 0             |
| Gram-positive cocci        | 9                  | 6 (66.7)        | 3 (33.3)      |
| Gram-negative bacteria     | 9                  | 5 (55.6)        | 4 (44.4)      |
| <i>Bacillus</i> spp.       | 5                  | 5 (100.0)       | 0             |
| Gram-positive bacteria     | 5                  | 5 (100.0)       | 0             |
| <i>Lactobacillus</i> spp.  | 4                  | 4 (100.0)       | 0             |
| <i>Rhodococcus</i> spp.    | 4                  | 4 (100.0)       | 0             |

|                                      |   |           |           |
|--------------------------------------|---|-----------|-----------|
| <i>Serratia liquefaciens</i>         | 4 | 4 (100.0) | 0         |
| <i>Staphylococcus</i> spp.           | 4 | 4 (100.0) | 0         |
| <i>Vibrio anguillarum</i> type 2     | 4 | 4 (100.0) | 0         |
| <i>Yersinia ruckeri</i> type 2       | 3 | 3 (100.0) | 0         |
| <i>Enterobacter</i> spp.             | 3 | 3 (100.0) | 0         |
| <i>Plesiomonas</i> spp.              | 3 | 3 (100.0) | 0         |
| <i>Carnobacterium maltaromaticum</i> | 2 | 1 (50.0)  | 1 (50.0)  |
| <i>Aliivibrio fischeri</i>           | 2 | 2 (100.0) | 0         |
| Gram-positive coccobacillus          | 2 | 2 (100.0) | 0         |
| <i>Micrococcus</i> spp.              | 2 | 2 (100.0) | 0         |
| <i>Acinetobacter</i> spp.            | 1 | 1 (100.0) | 0         |
| <i>Chryseobacterium</i> spp.         | 1 | 1 (100.0) | 0         |
| <i>Lactococcus lactis</i>            | 1 | 0         | 1 (100.0) |
| <i>Photobacterium damsel</i>         | 1 | 0         | 1 (100.0) |
| <i>Photobacterium</i> spp.           | 1 | 0         | 1 (100.0) |
| <i>Proteus vulgaris</i>              | 1 | 1 (100.0) | 0         |
| <i>Pseudomonas chlororaphis</i>      | 1 | 1 (100.0) | 0         |
| <i>Pseudomonas putida</i>            | 1 | 1 (100.0) | 0         |
| <i>Serratia</i> spp.                 | 1 | 1 (100.0) | 0         |
| <i>Staphylococcus epidermidis</i>    | 1 | 1 (100.0) | 0         |
| <i>Streptococcus</i> spp.            | 1 | 1 (100.0) | 0         |
| <i>Corynebacterium</i> spp.          | 1 | 0         | 1 (100.0) |
| <i>Vibrio anguillarum</i>            | 1 | 1 (100.0) | 0         |
| <i>Vibrio fischeri</i>               | 1 | 1 (100.0) | 0         |

**Table S4.** Antimicrobial susceptibility patterns (% S, I, and R) for tested antimicrobials in bacterial isolates from samples of salmonid. (2000-2021)

| Bacterial Isolates      | Florfenicol |     |       |     |      | Oxytetracycline |      |      |      | Ormetoprim-sulfadimethoxine |      |   |      | Trimethoprim-sulfamethoxazole |       |      |      |
|-------------------------|-------------|-----|-------|-----|------|-----------------|------|------|------|-----------------------------|------|---|------|-------------------------------|-------|------|------|
|                         | N           | n   | S     | I   | R    | n               | S    | I    | R    | n                           | S    | I | R    | n                             | S     | I    | R    |
| <i>Vibrio</i> spp.      | 141         | 140 | 100.0 | 0   | 0    | 141             | 91.0 | 2.1  | 7.1  | 63                          | 45.0 | 0 | 0    | 138                           | 97.2  | 0    | 0.7  |
| <i>Pseudomonas</i> spp. | 53          | 53  | 7.6   | 9.4 | 83.0 | 53              | 70.0 | 15.1 | 15.1 | 7                           | 0    | 0 | 13.2 | 53                            | 22.6  | 11.3 | 66.0 |
| <i>Aeromonas</i> spp.   | 45          | 44  | 91.1  | 2.2 | 4.4  | 44              | 36.0 | 2.2  | 60.0 | 6                           | 13.3 | 0 | 0    | 44                            | 91.1  | 0    | 6.7  |
| <i>Yersinia</i> spp.    | 28          | 27  | 100.0 | 0   | 0    | 28              | 96.0 | 0    | 3.6  | 25                          | 3.9  | 0 | 0    | 28                            | 100.0 | 0    | 0    |

|                            |    |    |      |      |      |    |      |      |      |   |      |   |     |    |       |   |      |
|----------------------------|----|----|------|------|------|----|------|------|------|---|------|---|-----|----|-------|---|------|
| <i>Flavobacterium</i> spp. | 21 | 21 | 85.7 | 0    | 14.3 | 21 | 67.0 | 0    | 33.3 | 3 | 9.5  | 0 | 4.8 | 18 | 57.1  | 0 | 28.6 |
| <i>Nocardia</i> spp.       | 12 | 12 | 8.3  | 42.0 | 50.0 | 12 | 8.3  | 25.0 | 66.7 | 5 | 41.7 | 0 | 0   | 12 | 100.0 | 0 | 0    |
|                            |    |    |      |      |      |    |      |      |      |   |      |   |     |    |       |   |      |
|                            |    |    |      |      |      |    |      |      |      |   |      |   |     |    |       |   |      |
|                            |    |    |      |      |      |    |      |      |      |   |      |   |     |    |       |   |      |
|                            |    |    |      |      |      |    |      |      |      |   |      |   |     |    |       |   |      |
|                            |    |    |      |      |      |    |      |      |      |   |      |   |     |    |       |   |      |
|                            |    |    |      |      |      |    |      |      |      |   |      |   |     |    |       |   |      |
|                            |    |    |      |      |      |    |      |      |      |   |      |   |     |    |       |   |      |
|                            |    |    |      |      |      |    |      |      |      |   |      |   |     |    |       |   |      |
|                            |    |    |      |      |      |    |      |      |      |   |      |   |     |    |       |   |      |
|                            |    |    |      |      |      |    |      |      |      |   |      |   |     |    |       |   |      |
|                            |    |    |      |      |      |    |      |      |      |   |      |   |     |    |       |   |      |
|                            |    |    |      |      |      |    |      |      |      |   |      |   |     |    |       |   |      |
|                            |    |    |      |      |      |    |      |      |      |   |      |   |     |    |       |   |      |
|                            |    |    |      |      |      |    |      |      |      |   |      |   |     |    |       |   |      |
|                            |    |    |      |      |      |    |      |      |      |   |      |   |     |    |       |   |      |
|                            |    |    |      |      |      |    |      |      |      |   |      |   |     |    |       |   |      |
|                            |    |    |      |      |      |    |      |      |      |   |      |   |     |    |       |   |      |
|                            |    |    |      |      |      |    |      |      |      |   |      |   |     |    |       |   |      |
|                            |    |    |      |      |      |    |      |      |      |   |      |   |     |    |       |   |      |
|                            |    |    |      |      |      |    |      |      |      |   |      |   |     |    |       |   |      |
|                            |    |    |      |      |      |    |      |      |      |   |      |   |     |    |       |   |      |
|                            |    |    |      |      |      |    |      |      |      |   |      |   |     |    |       |   |      |
|                            |    |    |      |      |      |    |      |      |      |   |      |   |     |    |       |   |      |
|                            |    |    |      |      |      |    |      |      |      |   |      |   |     |    |       |   |      |
|                            |    |    |      |      |      |    |      |      |      |   |      |   |     |    |       |   |      |
|                            |    |    |      |      |      |    |      |      |      |   |      |   |     |    |       |   |      |
|                            |    |    |      |      |      |    |      |      |      |   |      |   |     |    |       |   |      |
|                            |    |    |      |      |      |    |      |      |      |   |      |   |     |    |       |   |      |
|                            |    |    |      |      |      |    |      |      |      |   |      |   |     |    |       |   |      |
|                            |    |    |      |      |      |    |      |      |      |   |      |   |     |    |       |   |      |
|                            |    |    |      |      |      |    |      |      |      |   |      |   |     |    |       |   |      |
|                            |    |    |      |      |      |    |      |      |      |   |      |   |     |    |       |   |      |
|                            |    |    |      |      |      |    |      |      |      |   |      |   |     |    |       |   |      |
|                            |    |    |      |      |      |    |      |      |      |   |      |   |     |    |       |   |      |
|                            |    |    |      |      |      |    |      |      |      |   |      |   |     |    |       |   |      |
|                            |    |    |      |      |      |    |      |      |      |   |      |   |     |    |       |   |      |
|                            |    |    |      |      |      |    |      |      |      |   |      |   |     |    |       |   |      |
|                            |    |    |      |      |      |    |      |      |      |   |      |   |     |    |       |   |      |
|                            |    |    |      |      |      |    |      |      |      |   |      |   |     |    |       |   |      |
|                            |    |    |      |      |      |    |      |      |      |   |      |   |     |    |       |   |      |
|                            |    |    |      |      |      |    |      |      |      |   |      |   |     |    |       |   |      |
|                            |    |    |      |      |      |    |      |      |      |   |      |   |     |    |       |   |      |
|                            |    |    |      |      |      |    |      |      |      |   |      |   |     |    |       |   |      |
|                            |    |    |      |      |      |    |      |      |      |   |      |   |     |    |       |   |      |
|                            |    |    |      |      |      |    |      |      |      |   |      |   |     |    |       |   |      |
|                            |    |    |      |      |      |    |      |      |      |   |      |   |     |    |       |   |      |
|                            |    |    |      |      |      |    |      |      |      |   |      |   |     |    |       |   |      |
|                            |    |    |      |      |      |    |      |      |      |   |      |   |     |    |       |   |      |
|                            |    |    |      |      |      |    |      |      |      |   |      |   |     |    |       |   |      |
|                            |    |    |      |      |      |    |      |      |      |   |      |   |     |    |       |   |      |
|                            |    |    |      |      |      |    |      |      |      |   |      |   |     |    |       |   |      |
|                            |    |    |      |      |      |    |      |      |      |   |      |   |     |    |       |   |      |
|                            |    |    |      |      |      |    |      |      |      |   |      |   |     |    |       |   |      |
|                            |    |    |      |      |      |    |      |      |      |   |      |   |     |    |       |   |      |
|                            |    |    |      |      |      |    |      |      |      |   |      |   |     |    |       |   |      |
|                            |    |    |      |      |      |    |      |      |      |   |      |   |     |    |       |   |      |
|                            |    |    |      |      |      |    |      |      |      |   |      |   |     |    |       |   |      |
|                            |    |    |      |      |      |    |      |      |      |   |      |   |     |    |       |   |      |
|                            |    |    |      |      |      |    |      |      |      |   |      |   |     |    |       |   |      |
|                            |    |    |      |      |      |    |      |      |      |   |      |   |     |    |       |   |      |
|                            |    |    |      |      |      |    |      |      |      |   |      |   |     |    |       |   |      |
|                            |    |    |      |      |      |    |      |      |      |   |      |   |     |    |       |   |      |
|                            |    |    |      |      |      |    |      |      |      |   |      |   |     |    |       |   |      |
|                            |    |    |      |      |      |    |      |      |      |   |      |   |     |    |       |   |      |
|                            |    |    |      |      |      |    |      |      |      |   |      |   |     |    |       |   |      |
|                            |    |    |      |      |      |    |      |      |      |   |      |   |     |    |       |   |      |
|                            |    |    |      |      |      |    |      |      |      |   |      |   |     |    |       |   |      |
|                            |    |    |      |      |      |    |      |      |      |   |      |   |     |    |       |   |      |
|                            |    |    |      |      |      |    |      |      |      |   |      |   |     |    |       |   |      |
|                            |    |    |      |      |      |    |      |      |      |   |      |   |     |    |       |   |      |
|                            |    |    |      |      |      |    |      |      |      |   |      |   |     |    |       |   |      |
|                            |    |    |      |      |      |    |      |      |      |   |      |   |     |    |       |   |      |
|                            |    |    |      |      |      |    |      |      |      |   |      |   |     |    |       |   |      |
|                            |    |    |      |      |      |    |      |      |      |   |      |   |     |    |       |   |      |
|                            |    |    |      |      |      |    |      |      |      |   |      |   |     |    |       |   |      |
|                            |    |    |      |      |      |    |      |      |      |   |      |   |     |    |       |   |      |
|                            |    |    |      |      |      |    |      |      |      |   |      |   |     |    |       |   |      |
|                            |    |    |      |      |      |    |      |      |      |   |      |   |     |    |       |   |      |
|                            |    |    |      |      |      |    |      |      |      |   |      |   |     |    |       |   |      |
|                            |    |    |      |      |      |    |      |      |      |   |      |   |     |    |       |   |      |
|                            |    |    |      |      |      |    |      |      |      |   |      |   |     |    |       |   |      |
|                            |    |    |      |      |      |    |      |      |      |   |      |   |     |    |       |   |      |
|                            |    |    |      |      |      |    |      |      |      |   |      |   |     |    |       |   |      |
|                            |    |    |      |      |      |    |      |      |      |   |      |   |     |    |       |   |      |
|                            |    |    |      |      |      |    |      |      |      |   |      |   |     |    |       |   |      |
|                            |    |    |      |      |      |    |      |      |      |   |      |   |     |    |       |   |      |
|                            |    |    |      |      |      |    |      |      |      |   |      |   |     |    |       |   |      |
|                            |    |    |      |      |      |    |      |      |      |   |      |   |     |    |       |   |      |
|                            |    |    |      |      |      |    |      |      |      |   |      |   |     |    |       |   |      |
|                            |    |    |      |      |      |    |      |      |      |   |      |   |     |    |       |   |      |
|                            |    |    |      |      |      |    |      |      |      |   |      |   |     |    |       |   |      |
|                            |    |    |      |      |      |    |      |      |      |   |      |   |     |    |       |   |      |
|                            |    |    |      |      |      |    |      |      |      |   |      |   |     |    |       |   |      |
|                            |    |    |      |      |      |    |      |      |      |   |      |   |     |    |       |   |      |
|                            |    |    |      |      |      |    |      |      |      |   |      |   |     |    |       |   |      |
|                            |    |    |      |      |      |    |      |      |      |   |      |   |     |    |       |   |      |
|                            |    |    |      |      |      |    |      |      |      |   |      |   |     |    |       |   |      |
|                            |    |    |      |      |      |    |      |      |      |   |      |   |     |    |       |   |      |
|                            |    |    |      |      |      |    |      |      |      |   |      |   |     |    |       |   |      |
|                            |    |    |      |      |      |    |      |      |      |   |      |   |     |    |       |   |      |
|                            |    |    |      |      |      |    |      |      |      |   |      |   |     |    |       |   |      |
|                            |    |    |      |      |      |    |      |      |      |   |      |   |     |    |       |   |      |
|                            |    |    |      |      |      |    |      |      |      |   |      |   |     |    |       |   |      |
|                            |    |    |      |      |      |    |      |      |      |   |      |   |     |    |       |   |      |
|                            |    |    |      |      |      |    |      |      |      |   |      |   |     |    |       |   |      |
|                            |    |    |      |      |      |    |      |      |      |   |      |   |     |    |       |   |      |
|                            |    |    |      |      |      |    |      |      |      |   |      |   |     |    |       |   |      |
|                            |    |    |      |      |      |    |      |      |      |   |      |   |     |    |       |   |      |
|                            |    |    |      |      |      |    |      |      |      |   |      |   |     |    |       |   |      |
|                            |    |    |      |      |      |    |      |      |      |   |      |   |     |    |       |   |      |
|                            |    |    |      |      |      |    |      |      |      |   |      |   |     |    |       |   |      |
|                            |    |    |      |      |      |    |      |      |      |   |      |   |     |    |       |   |      |
|                            |    |    |      |      |      |    |      |      |      |   |      |   |     |    |       |   |      |
|                            |    |    |      |      |      |    |      |      |      |   |      |   |     |    |       |   |      |
|                            |    |    |      |      |      |    |      |      |      |   |      |   |     |    |       |   |      |
|                            |    |    |      |      |      |    |      |      |      |   |      |   |     |    |       |   |      |
|                            |    |    |      |      |      |    |      |      |      |   |      |   |     |    |       |   |      |
|                            |    |    |      |      |      |    |      |      |      |   |      |   |     |    |       |   |      |
|                            |    |    |      |      |      |    |      |      |      |   |      |   |     |    |       |   |      |
|                            |    |    |      |      |      |    |      |      |      |   |      |   |     |    |       |   |      |
|                            |    |    |      |      |      |    |      |      |      |   |      |   |     |    |       |   |      |
|                            |    |    |      |      |      |    |      |      |      |   |      |   |     |    |       |   |      |
|                            |    |    |      |      |      |    |      |      |      |   |      |   |     |    |       |   |      |
|                            |    |    |      |      |      |    |      |      |      |   |      |   |     |    |       |   |      |
|                            |    |    |      |      |      |    |      |      |      |   |      |   |     |    |       |   |      |
|                            |    |    |      |      |      |    |      |      |      |   |      |   |     |    |       |   |      |
|                            |    |    |      |      |      |    |      |      |      |   |      |   |     |    |       |   |      |
|                            |    |    |      |      |      |    |      |      |      |   |      |   |     |    |       |   |      |
|                            |    |    |      |      |      |    |      |      |      |   |      |   |     |    |       |   |      |
|                            |    |    |      |      |      |    |      |      |      |   |      |   |     |    |       |   |      |
|                            |    |    |      |      |      |    |      |      |      |   |      |   |     |    |       |   |      |
|                            |    |    |      |      |      |    |      |      |      |   |      |   |     |    |       |   |      |
|                            |    |    |      |      |      |    |      |      |      |   |      |   |     |    |       |   |      |
|                            |    |    |      |      |      |    |      |      |      |   |      |   |     |    |       |   |      |
|                            |    |    |      |      |      |    |      |      |      |   |      |   |     |    |       |   |      |
|                            |    |    |      |      |      |    |      |      |      |   |      |   |     |    |       |   |      |
|                            |    |    |      |      |      |    |      |      |      |   |      |   |     |    |       |   |      |
|                            |    |    |      |      |      |    |      |      |      |   |      |   |     |    |       |   |      |
|                            |    |    |      |      |      |    |      |      |      |   |      |   |     |    |       |   |      |
|                            |    |    |      |      |      |    |      |      |      |   |      |   |     |    |       |   |      |
|                            |    |    |      |      |      |    |      |      |      |   |      |   |     |    |       |   |      |
|                            |    |    |      |      |      |    |      |      |      |   |      |   |     |    |       |   |      |
|                            |    |    |      |      |      |    |      |      |      |   |      |   |     |    |       |   |      |
|                            |    |    |      |      |      |    |      |      |      |   |      |   |     |    |       |   |      |
|                            |    |    |      |      |      |    |      |      |      |   |      |   |     |    |       |   |      |
|                            |    |    |      |      |      |    |      |      |      |   |      |   |     |    |       |   |      |
|                            |    |    |      |      |      |    |      |      |      |   |      |   |     |    |       |   |      |
|                            |    |    |      |      |      |    |      |      |      |   |      |   |     |    |       |   |      |
|                            |    |    |      |      |      |    |      |      |      |   |      |   |     |    |       |   |      |
|                            |    |    |      |      |      |    |      |      |      |   |      |   |     |    |       |   |      |
|                            |    |    |      |      |      |    |      |      |      |   |      |   |     |    |       |   |      |
|                            |    |    |      |      |      |    |      |      |      |   |      |   |     |    |       |   |      |
|                            |    |    |      |      |      |    |      |      |      |   |      |   |     |    |       |   |      |
|                            |    |    |      |      |      |    |      |      |      |   |      |   |     |    |       |   |      |
|                            |    |    |      |      |      |    |      |      |      |   |      |   |     |    |       |   |      |
|                            |    |    |      |      |      |    |      |      |      |   |      |   |     |    |       |   |      |
|                            |    |    |      |      |      |    |      |      |      |   |      |   |     |    |       |   |      |
|                            |    |    |      |      |      |    |      |      |      |   |      |   |     |    |       |   |      |
|                            |    |    |      |      |      |    |      |      |      |   |      |   |     |    |       |   |      |
|                            |    |    |      |      |      |    |      |      |      |   |      |   |     |    |       |   |      |
|                            |    |    |      |      |      |    |      |      |      |   |      |   |     |    |       |   |      |
|                            |    |    |      |      |      |    |      |      |      |   |      |   |     |    |       |   |      |
|                            |    |    |      |      |      |    |      |      |      |   |      |   |     |    |       |   |      |
|                            |    |    |      |      |      |    |      |      |      |   |      |   |     |    |       |   |      |
|                            |    |    |      |      |      |    |      |      |      |   |      |   |     |    |       |   |      |
|                            |    |    |      |      |      |    |      |      |      |   |      |   |     |    |       |   |      |
|                            |    |    |      |      |      |    |      |      |      |   |      |   |     |    |       |   |      |
|                            |    |    |      |      |      |    |      |      |      |   |      |   |     |    |       |   |      |
|                            |    |    |      |      |      |    |      |      |      |   |      |   |     |    |       |   |      |
|                            |    |    |      |      |      |    |      |      |      |   |      |   |     |    |       |   |      |
|                            |    |    |      |      |      |    |      |      |      |   |      |   |     |    |       |   |      |
|                            |    |    |      |      |      |    |      |      |      |   |      |   |     |    |       |   |      |
|                            |    |    |      |      |      |    |      |      |      |   |      |   |     |    |       |   |      |
|                            |    |    |      |      |      |    |      |      |      |   |      |   |     |    |       |   |      |
|                            |    |    |      |      |      |    |      |      |      |   |      |   |     |    |       |   |      |
|                            |    |    |      |      |      |    |      |      |      |   |      |   |     |    |       |   |      |
|                            |    |    |      |      |      |    |      |      |      |   |      |   |     |    |       |   |      |
|                            |    |    |      |      |      |    |      |      |      |   |      |   |     |    |       |   |      |
|                            |    |    |      |      |      |    |      |      |      |   |      |   |     |    |       |   |      |
|                            |    |    |      |      |      |    |      |      |      |   |      |   |     |    |       |   |      |
|                            |    |    |      |      |      |    |      |      |      |   |      |   |     |    |       |   |      |
|                            |    |    |      |      |      |    |      |      |      |   |      |   |     |    |       |   |      |
|                            |    |    |      |      |      |    |      |      |      |   |      |   |     |    |       |   |      |
|                            |    |    |      |      |      |    |      |      |      |   |      |   |     |    |       |   |      |
|                            |    |    |      |      |      |    |      |      |      |   |      |   |     |    |       |   |      |
|                            |    |    |      |      |      |    |      |      |      |   |      |   |     |    |       |   |      |
|                            |    |    |      |      |      |    |      |      |      |   |      |   |     |    |       |   |      |
|                            |    |    |      |      |      |    |      |      |      |   |      |   |     |    |       |   |      |
|                            |    |    |      |      |      |    |      |      |      |   |      |   |     |    |       |   |      |
|                            |    |    |      |      |      |    |      |      |      |   |      |   |     |    |       |   |      |
|                            |    |    |      |      |      |    |      |      |      |   |      |   |     |    |       |   |      |
|                            |    |    |      |      |      |    |      |      |      |   |      |   |     |    |       |   |      |
|                            |    |    |      |      |      |    |      |      |      |   |      |   |     |    |       |   |      |
|                            |    |    |      |      |      |    |      |      |      |   |      |   |     |    |       |   |      |
|                            |    |    |      |      |      |    |      |      |      |   |      |   |     |    |       |   |      |
|                            |    |    |      |      |      |    |      |      |      |   |      |   |     |    |       |   |      |
|                            |    |    |      |      |      |    |      |      |      |   |      |   |     |    |       |   |      |
|                            |    |    |      |      |      |    |      |      |      |   |      |   |     |    |       |   |      |
|                            |    |    |      |      |      |    |      |      |      |   |      |   |     |    |       |   |      |
|                            |    |    |      |      |      |    |      |      |      |   |      |   |     |    |       |   |      |
|                            |    |    |      |      |      |    |      |      |      |   |      |   |     |    |       |   |      |
|                            |    |    |      |      |      |    |      |      |      |   |      |   |     |    |       |   |      |
|                            |    |    |      |      |      |    |      |      |      |   |      |   |     |    |       |   |      |
|                            |    |    |      |      |      |    |      |      |      |   |      |   |     |    |       |   |      |
|                            |    |    |      |      |      |    |      |      |      |   |      |   |     |    |       |   |      |
|                            |    |    |      |      |      |    |      |      |      |   |      |   |     |    |       |   |      |
|                            |    |    |      |      |      |    |      |      |      |   |      |   |     |    |       |   |      |
|                            |    |    |      |      |      |    |      |      |      |   |      |   |     |    |       |   |      |
|                            |    |    |      |      |      |    |      |      |      |   |      |   |     |    |       |   |      |
|                            |    |    |      |      |      |    |      |      |      |   |      |   |     |    |       |   |      |
|                            |    |    |      |      |      |    |      |      |      |   |      |   |     |    |       |   |      |
|                            |    |    |      |      |      |    |      |      |      |   |      |   |     |    |       |   |      |
|                            |    |    |      |      |      |    |      |      |      |   |      |   |     |    |       |   |      |
|                            |    |    |      |      |      |    |      |      |      |   |      |   |     |    |       |   |      |
|                            |    |    |      |      |      |    |      |      |      |   |      |   |     |    |       |   |      |
|                            |    |    |      |      |      |    |      |      |      |   |      |   |     |    |       |   |      |
|                            |    |    |      |      |      |    |      |      |      |   |      |   |     |    |       |   |      |
|                            |    |    |      |      |      |    |      |      |      |   |      |   |     |    |       |   |      |
|                            |    |    |      |      |      |    |      |      |      |   |      |   |     |    |       |   |      |
|                            |    |    |      |      |      |    |      |      |      |   |      |   |     |    |       |   |      |
|                            |    |    |      |      |      |    |      |      |      |   |      |   |     |    |       |   |      |
|                            |    |    |      |      |      |    |      |      |      |   |      |   |     |    |       |   |      |
|                            |    |    |      |      |      |    |      |      |      |   |      |   |     |    |       |   |      |
|                            |    |    |      |      |      |    |      |      |      |   |      |   |     |    |       |   |      |
|                            |    |    |      |      |      |    |      |      |      |   |      |   |     |    |       |   |      |
|                            |    |    |      |      |      |    |      |      |      |   |      |   |     |    |       |   |      |
|                            |    |    |      |      |      |    |      |      |      |   |      |   |     |    |       |   |      |
|                            |    |    |      |      |      |    |      |      |      |   |      |   |     |    |       |   |      |
|                            |    |    |      |      |      |    |      |      |      |   |      |   |     |    |       |   |      |
|                            |    |    |      |      |      |    |      |      |      |   |      |   |     |    |       |   |      |
|                            |    |    |      |      |      |    |      |      |      |   |      |   |     |    |       |   |      |
|                            |    |    |      |      |      |    |      |      |      |   |      |   |     |    |       |   |      |
|                            |    |    |      |      |      |    |      |      |      |   |      |   |     |    |       |   |      |
|                            |    |    |      |      |      |    |      |      |      |   |      |   |     |    |       |   |      |
|                            |    |    |      |      |      |    |      |      |      |   |      |   |     |    |       |   |      |
|                            |    |    |      |      |      |    |      |      |      |   |      |   |     |    |       |   |      |
|                            |    |    |      |      |      |    |      |      |      |   |      |   |     |    |       |   |      |
|                            |    |    |      |      |      |    |      |      |      |   |      |   |     |    |       |   |      |
|                            |    |    |      |      |      |    |      |      |      |   |      |   |     |    |       |   |      |
|                            |    |    |      |      |      |    |      |      |      |   |      |   |     |    |       |   |      |
|                            |    |    |      |      |      |    |      |      |      |   |      |   |     |    |       |   |      |
|                            |    |    |      |      |      |    |      |      |      |   |      |   |     |    |       |   |      |
|                            |    |    |      |      |      |    |      |      |      |   |      |   |     |    |       |   |      |
|                            |    |    |      |      |      |    |      |      |      |   |      |   |     |    |       |   |      |
|                            |    |    |      |      |      |    |      |      |      |   |      |   |     |    |       |   |      |
|                            |    |    |      |      |      |    |      |      |      |   |      |   |     |    |       |   |      |
|                            |    |    |      |      |      |    |      |      |      |   |      |   |     |    |       |   |      |
|                            |    |    |      |      |      |    |      |      |      |   |      |   |     |    |       |   |      |
|                            |    |    |      |      |      |    |      |      |      |   |      |   |     |    |       |   |      |
|                            |    |    |      |      |      |    |      |      |      |   |      |   |     |    |       |   |      |
|                            |    |    |      |      |      |    |      |      |      |   |      |   |     |    |       |   |      |
|                            |    |    |      |      |      |    |      |      |      |   |      |   |     |    |       |   |      |
|                            |    |    |      |      |      |    |      |      |      |   |      |   |     |    |       |   |      |
|                            |    |    |      |      |      |    |      |      |      |   |      |   |     |    |       |   |      |
|                            |    |    |      |      |      |    |      |      |      |   |      |   |     |    |       |   |      |
|                            |    |    |      |      |      |    |      |      |      |   |      |   |     |    |       |   |      |
|                            |    |    |      |      |      |    |      |      |      |   |      |   |     |    |       |   |      |
|                            |    |    |      |      |      |    |      |      |      |   |      |   |     |    |       |   |      |
|                            |    |    |      |      |      |    |      |      |      |   |      |   |     |    |       |   |      |
|                            |    |    |      |      |      |    |      |      |      |   |      |   |     |    |       |   |      |
|                            |    |    |      |      |      |    |      |      |      |   |      |   |     |    |       |   |      |
|                            |    |    |      |      |      |    |      |      |      |   |      |   |     |    |       |   |      |
|                            |    |    |      |      |      |    |      |      |      |   |      |   |     |    |       |   |      |
|                            |    |    |      |      |      |    |      |      |      |   |      |   |     |    |       |   |      |
|                            |    |    |      |      |      |    |      |      |      |   |      |   |     |    |       |   |      |
|                            |    |    |      |      |      |    |      |      |      |   |      |   |     |    |       |   |      |
|                            |    |    |      |      |      |    |      |      |      |   |      |   |     |    |       |   |      |
|                            |    |    |      |      |      |    |      |      |      |   |      |   |     |    |       |   |      |
|                            |    |    |      |      |      |    |      |      |      |   |      |   |     |    |       |   |      |
|                            |    |    |      |      |      |    |      |      |      |   |      |   |     |    |       |   |      |
|                            |    |    |      |      |      |    |      |      |      |   |      |   |     |    |       |   |      |
|                            |    |    |      |      |      |    |      |      |      |   |      |   |     |    |       |   |      |
|                            |    |    |      |      |      |    |      |      |      |   |      |   |     |    |       |   |      |
|                            |    |    |      |      |      |    |      |      |      |   |      |   |     |    |       |   |      |
|                            |    |    |      |      |      |    |      |      |      |   |      |   |     |    |       |   |      |
|                            |    |    |      |      |      |    |      |      |      |   |      |   |     |    |       |   |      |
|                            |    |    |      |      |      |    |      |      |      |   |      |   |     |    |       |   |      |
|                            |    |    |      |      |      |    |      |      |      |   |      |   |     |    |       |   |      |
|                            |    |    |      |      |      |    |      |      |      |   |      |   |     |    |       |   |      |
|                            |    |    |      |      |      |    |      |      |      |   |      |   |     |    |       |   |      |
|                            |    |    |      |      |      |    |      |      |      |   |      |   |     |    |       |   |      |
|                            |    |    |      |      |      |    |      |      |      |   |      |   |     |    |       |   |      |
|                            |    |    |      |      |      |    |      |      |      |   |      |   |     |    |       |   |      |
|                            |    |    |      |      |      |    |      |      |      |   |      |   |     |    |       |   |      |
|                            |    |    |      |      |      |    |      |      |      |   |      |   |     |    |       |   |      |
|                            |    |    |      |      |      |    |      |      |      |   |      |   |     |    |       |   |      |
|                            |    |    |      |      |      |    |      |      |      |   |      |   |     |    |       |   |      |
|                            |    |    |      |      |      |    |      |      |      |   |      |   |     |    |       |   |      |
|                            |    |    |      |      |      |    |      |      |      |   |      |   |     |    |       |   |      |
|                            |    |    |      |      |      |    |      |      |      |   |      |   |     |    |       |   |      |
|                            |    |    |      |      |      |    |      |      |      |   |      |   |     |    |       |   |      |
|                            |    |    |      |      |      |    |      |      |      |   |      |   |     |    |       |   |      |
|                            |    |    |      |      |      |    |      |      |      |   |      |   |     |    |       |   |      |
|                            |    |    |      |      |      |    |      |      |      |   |      |   |     |    |       |   |      |
|                            |    |    |      |      |      |    |      |      |      |   |      |   |     |    |       |   |      |
|                            |    |    |      |      |      |    |      |      |      |   |      |   |     |    |       |   |      |
|                            |    |    |      |      |      |    |      |      |      |   |      |   |     |    |       |   |      |
|                            |    |    |      |      |      |    |      |      |      |   |      |   |     |    |       |   |      |
|                            |    |    |      |      |      |    |      |      |      |   |      |   |     |    |       |   |      |
|                            |    |    |      |      |      |    |      |      |      |   |      |   |     |    |       |   |      |
|                            |    |    |      |      |      |    |      |      |      |   |      |   |     |    |       |   |      |
|                            |    |    |      |      |      |    |      |      |      |   |      |   |     |    |       |   |      |
|                            |    |    |      |      |      |    |      |      |      |   |      |   |     |    |       |   |      |
|                            |    |    |      |      |      |    |      |      |      |   |      |   |     |    |       |   |      |
|                            |    |    |      |      |      |    |      |      |      |   |      |   |     |    |       |   |      |
|                            |    |    |      |      |      |    |      |      |      |   |      |   |     |    |       |   |      |
|                            |    |    |      |      |      |    |      |      |      |   |      |   |     |    |       |   |      |
|                            |    |    |      |      |      |    |      |      |      |   |      |   |     |    |       |   |      |
|                            |    |    |      |      |      |    |      |      |      |   |      |   |     |    |       |   |      |
|                            |    |    |      |      |      |    |      |      |      |   |      |   |     |    |       |   |      |
|                            |    |    |      |      |      |    |      |      |      |   |      |   |     |    |       |   |      |
|                            |    |    |      |      |      |    |      |      |      |   |      |   |     |    |       |   |      |
|                            |    |    |      |      |      |    |      |      |      |   |      |   |     |    |       |   |      |
|                            |    |    |      |      |      |    |      |      |      |   |      |   |     |    |       |   |      |
|                            |    |    |      |      |      |    |      |      |      |   |      |   |     |    |       |   |      |
|                            |    |    |      |      |      |    |      |      |      |   |      |   |     |    |       |   |      |
|                            |    |    |      |      |      |    |      |      |      |   |      |   |     |    |       |   |      |
|                            |    |    |      |      |      |    |      |      |      |   |      |   |     |    |       |   |      |
|                            |    |    |      |      |      |    |      |      |      |   |      |   |     |    |       |   |      |
|                            |    |    |      |      |      |    |      |      |      |   |      |   |     |    |       |   |      |
|                            |    |    |      |      |      |    |      |      |      |   |      |   |     |    |       |   |      |
|                            |    |    |      |      |      |    |      |      |      |   |      |   |     |    |       |   |      |
|                            |    |    |      |      |      |    |      |      |      |   |      |   |     |    |       |   |      |
|                            |    |    |      |      |      |    |      |      |      |   |      |   |     |    |       |   |      |
|                            |    |    |      |      |      |    |      |      |      |   |      |   |     |    |       |   |      |
|                            |    |    |      |      |      |    |      |      |      |   |      |   |     |    |       |   |      |
|                            |    |    |      |      |      |    |      |      |      |   |      |   |     |    |       |   |      |
|                            |    |    |      |      |      |    |      |      |      |   |      |   |     |    |       |   |      |
|                            |    |    |      |      |      |    |      |      |      |   |      |   |     |    |       |   |      |
|                            |    |    |      |      |      |    |      |      |      |   |      |   |     |    |       |   |      |
|                            |    |    |      |      |      |    |      |      |      |   |      |   |     |    |       |   |      |
|                            |    |    |      |      |      |    |      |      |      |   |      |   |     |    |       |   |      |
|                            |    |    |      |      |      |    |      |      |      |   |      |   |     |    |       |   |      |
|                            |    |    |      |      |      |    |      |      |      |   |      |   |     |    |       |   |      |
|                            |    |    |      |      |      |    |      |      |      |   |      |   |     |    |       |   |      |
|                            |    |    |      |      |      |    |      |      |      |   |      |   |     |    |       |   |      |
|                            |    |    |      |      |      |    |      |      |      |   |      |   |     |    |       |   |      |
|                            |    |    |      |      |      |    |      |      |      |   |      |   |     |    |       |   |      |
|                            |    |    |      |      |      |    |      |      |      |   |      |   |     |    |       |   |      |
|                            |    |    |      |      |      |    |      |      |      |   |      |   |     |    |       |   |      |
|                            |    |    |      |      |      |    |      |      |      |   |      |   |     |    |       |   |      |
|                            |    |    |      |      |      |    |      |      |      |   |      |   |     |    |       |   |      |
|                            |    |    |      |      |      |    |      |      |      |   |      |   |     |    |       |   |      |
|                            |    |    |      |      |      |    |      |      |      |   |      |   |     |    |       |   |      |
|                            |    |    |      |      |      |    |      |      |      |   |      |   |     |    |       |   |      |
|                            |    |    |      |      |      |    |      |      |      |   |      |   |     |    |       |   |      |
|                            |    |    |      |      |      |    |      |      |      |   |      |   |     |    |       |   |      |
|                            |    |    |      |      |      |    |      |      |      |   |      |   |     |    |       |   |      |
|                            |    |    |      |      |      |    |      |      |      |   |      |   |     |    |       |   |      |
|                            |    |    |      |      |      |    |      |      |      |   |      |   |     |    |       |   |      |
|                            |    |    |      |      |      |    |      |      |      |   |      |   |     |    |       |   |      |
|                            |    |    |      |      |      |    |      |      |      |   |      |   |     |    |       |   |      |
|                            |    |    |      |      |      |    |      |      |      |   |      |   |     |    |       |   |      |
|                            |    |    |      |      |      |    |      |      |      |   |      |   |     |    |       |   |      |
|                            |    |    |      |      |      |    |      |      |      |   |      |   |     |    |       |   |      |
|                            |    |    |      |      |      |    |      |      |      |   |      |   |     |    |       |   |      |
|                            |    |    |      |      |      |    |      |      |      |   |      |   |     |    |       |   |      |
|                            |    |    |      |      |      |    |      |      |      |   |      |   |     |    |       |   |      |
|                            |    |    |      |      |      |    |      |      |      |   |      |   |     |    |       |   |      |
|                            |    |    |      |      |      |    |      |      |      |   |      |   |     |    |       |   |      |
|                            |    |    |      |      |      |    |      |      |      |   |      |   |     |    |       |   |      |
|                            |    |    |      |      |      |    |      |      |      |   |      |   |     |    |       |   |      |
|                            |    |    |      |      |      |    |      |      |      |   |      |   |     |    |       |   |      |
|                            |    |    |      |      |      |    |      |      |      |   |      |   |     |    |       |   |      |
|                            |    |    |      |      |      |    |      |      |      |   |      |   |     |    |       |   |      |
|                            |    |    |      |      |      |    |      |      |      |   |      |   |     |    |       |   |      |
|                            |    |    |      |      |      |    |      |      |      |   |      |   |     |    |       |   |      |
|                            |    |    |      |      |      |    |      |      |      |   |      |   |     |    |       |   |      |
|                            |    |    |      |      |      |    |      |      |      |   |      |   |     |    |       |   |      |
|                            |    |    |      |      |      |    |      |      |      |   |      |   |     |    |       |   |      |
|                            |    |    |      |      |      |    |      |      |      |   |      |   |     |    |       |   |      |
|                            |    |    |      |      |      |    |      |      |      |   |      |   |     |    |       |   |      |
|                            |    |    |      |      |      |    |      |      |      |   |      |   |     |    |       |   |      |
|                            |    |    |      |      |      |    |      |      |      |   |      |   |     |    |       |   |      |
|                            |    |    |      |      |      |    |      |      |      |   |      |   |     |    |       |   |      |
|                            |    |    |      |      |      |    |      |      |      |   |      |   |     |    |       |   |      |
|                            |    |    |      |      |      |    |      |      |      |   |      |   |     |    |       |   |      |
|                            |    |    |      |      |      |    |      |      |      |   |      |   |     |    |       |   |      |
|                            |    |    |      |      |      |    |      |      |      |   |      |   |     |    |       |   |      |
|                            |    |    |      |      |      |    |      |      |      |   |      |   |     |    |       |   |      |
|                            |    |    |      |      |      |    |      |      |      |   |      |   |     |    |       |   |      |
|                            |    |    |      |      |      |    |      |      |      |   |      |   |     |    |       |   |      |

N= Total number of isolates, n=number of isolates that were tested for antimicrobial susceptibility, S- Susceptible, I- Intermediate, R- Resistant cumulative percentages may not add up to 100 as not all isolates had susceptibility test.
